# Supplementary material for: Pembrolizumab Monotherapy for Previously Untreated Advanced Hepatocellular Carcinoma: Data from the Open-Label, Phase II KEYNOTE-224 Trial
Source: PubMed Central journal article supplement — Clin Cancer Res. 2022 Apr 14;28(12):2547–54. doi: 10.1158/1078-0432.CCR-21-3807 (PMC9784157; doi:10.1158/1078-0432.ccr-21-3807), 2022-04-14
Supplement: ccr-21-3807_supplementary_table_s1_suppts1.pdf [file ccr-21-3807_supplementary_table_s1_suppts1.pdf]

**Supplementary Table 1**

| <b>Response, n (%)</b>                      | <b>irRECIST,<br/>central imaging<br/>review<br/>(N=51)</b> | <b>mRECIST,<br/>central imaging<br/>review<br/>(N=51)</b> | <b>RECIST 1.1,<br/>investigator's<br/>review<br/>(N=51)</b> |
|---------------------------------------------|------------------------------------------------------------|-----------------------------------------------------------|-------------------------------------------------------------|
| ORR, % (95% CI)                             | 18 (8-31)                                                  | 18 (8-31)                                                 | 18 (8-31)                                                   |
| DCR, % (95% CI)                             | 61 (46-74)                                                 | 51 (37-65)                                                | 59 (44-72)                                                  |
| <b>Best overall response, n (%)</b>         |                                                            |                                                           |                                                             |
| Complete response                           | 1 (2)                                                      | 3 (6)                                                     | 1 (2)                                                       |
| Partial response                            | 8 (16)                                                     | 6 (12)                                                    | 8 (16)                                                      |
| Stable disease                              | 22 (43)                                                    | 17 (33)                                                   | 21 (41)                                                     |
| Progressive disease                         | 15 (29)                                                    | 17 (33)                                                   | 17 (33)                                                     |
| Non-evaluable*                              | 2 (4)                                                      | 2 (4)                                                     | 1 (2)                                                       |
| No evidence of disease†                     | 0                                                          | 2 (4)                                                     | 0                                                           |
| No assessment‡                              | 3 (6)                                                      | 3 (6)                                                     | 3 (6)                                                       |
| Time to response, median<br>(range), months | 6 (2-13)                                                   | 2 (2-10)                                                  | 4 (2-4)                                                     |
| DOR, median (range),<br>months              | 16 (3-24+)                                                 | 16 (3-23+)                                                | 20 (3-21)                                                   |
