# Supplementary material for: Pembrolizumab Monotherapy for Previously Untreated Advanced Hepatocellular Carcinoma: Data from the Open-Label, Phase II KEYNOTE-224 Trial
Source: PubMed Central journal article supplement — Clin Cancer Res. 2022 Apr 14;28(12):2547–54. doi: 10.1158/1078-0432.CCR-21-3807 (PMC9784157; doi:10.1158/1078-0432.ccr-21-3807), 2022-04-14
Supplement: ccr-21-3807_supplementary_table_s2_suppts2.pdf [file ccr-21-3807_supplementary_table_s2_suppts2.pdf]

**Supplementary Table 2**

| n (%)                                                                                        | Patients<br>N=51 |                |
|----------------------------------------------------------------------------------------------|------------------|----------------|
|                                                                                              | Any grade        | Grade 3        |
| <b>Common treatment-related adverse events (incidence <math>\geq</math>5%, any grade)</b>    |                  |                |
|                                                                                              | <b>Any grade</b> | <b>Grade 3</b> |
| Diarrhea                                                                                     | 5 (10)           | 0              |
| Fatigue                                                                                      | 4 (8)            | 0              |
| Hypothyroidism                                                                               | 4 (8)            | 0              |
| Myalgia                                                                                      | 4 (8)            | 1 (2)          |
| Abdominal pain                                                                               | 3 (6)            | 1 (2)          |
| Cough                                                                                        | 3 (6)            | 0              |
| Rash                                                                                         | 3 (6)            | 0              |
| <b>Immune-mediated adverse events and infusion reactions (incidence <math>&gt;</math>0%)</b> |                  |                |
|                                                                                              | <b>Any grade</b> | <b>Grade 3</b> |
| Hypothyroidism                                                                               | 6 (12)           | 0              |
| Severe skin reactions                                                                        | 2 (4)            | 2 (4)          |
| Infusion reactions                                                                           | 2 (4)            | 0              |
| Hyperthyroidism                                                                              | 2 (4)            | 0              |
| Colitis                                                                                      | 1 (2)            | 1 (2)          |
| Type 1 diabetes mellitus                                                                     | 1 (2)            | 1 (2)          |
| Hypophysitis                                                                                 | 2 (4)            | 1 (2)          |
| Hepatitis                                                                                    | 1 (2)            | 1 (2)          |
| Myocarditis <sup>†</sup>                                                                     | 1 (2)            | 0              |
| Myositis                                                                                     | 1 (2)            | 1 (2)          |
| Pneumonitis                                                                                  | 1 (2)            | 0              |
