# Supplementary figures and images for: Pembrolizumab Monotherapy for Previously Untreated Advanced Hepatocellular Carcinoma: Data from the Open-Label, Phase II KEYNOTE-224 Trial
Source: PubMed Central journal article supplement — Clin Cancer Res. 2022 Apr 14;28(12):2547–54. doi: 10.1158/1078-0432.CCR-21-3807 (PMC9784157; doi:10.1158/1078-0432.ccr-21-3807), 2022-04-14

Supplementary Figure 2

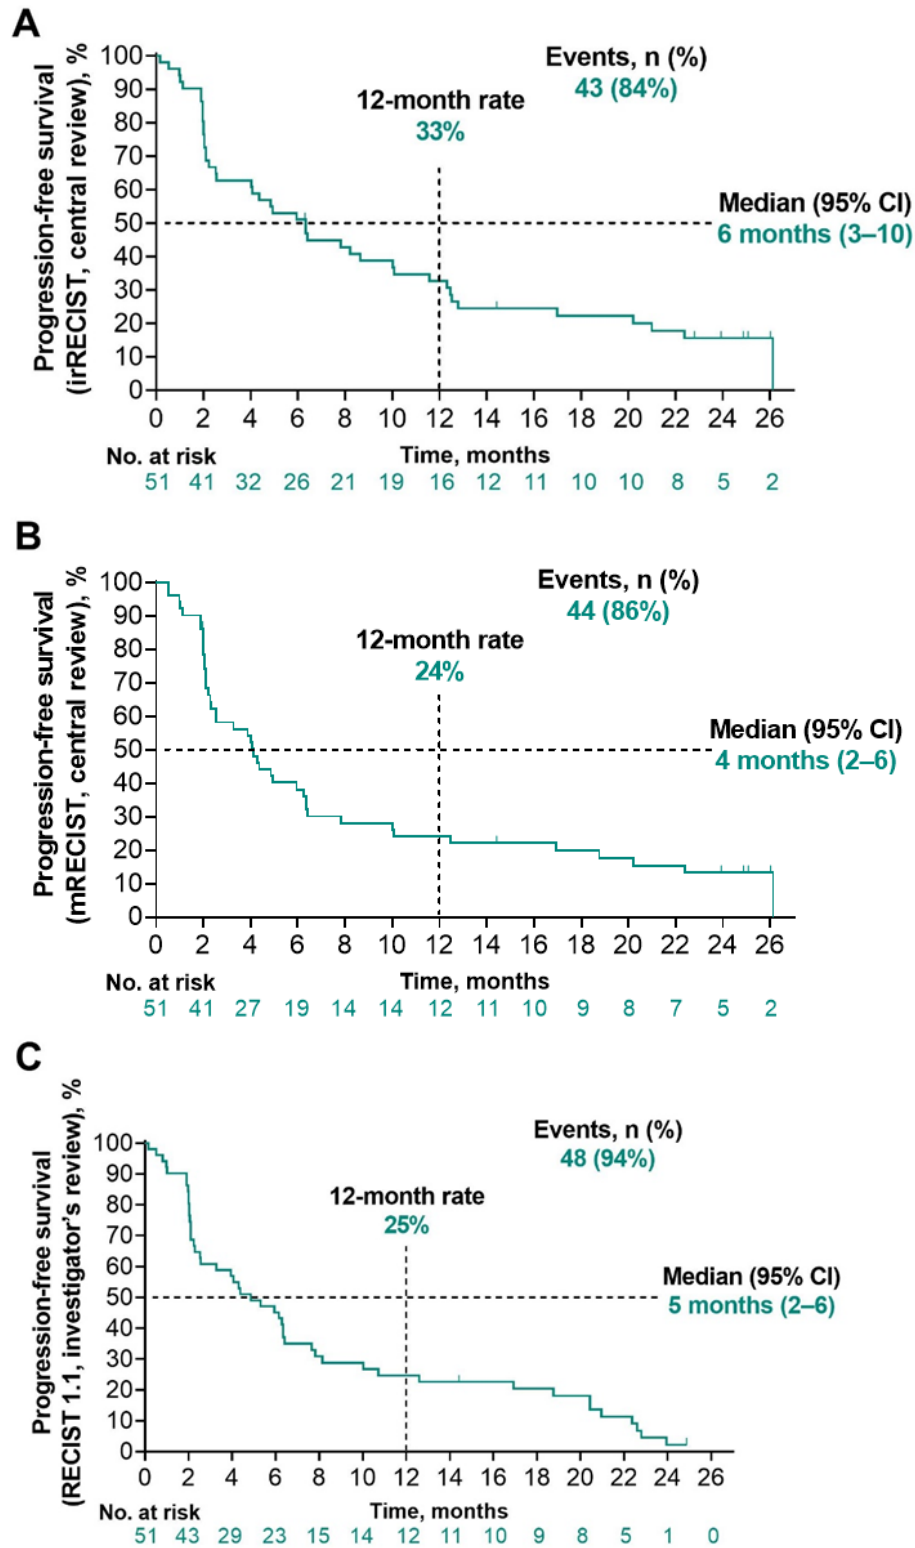

Supplement: ccr-21-3807_supplementary_figure_s2_suppfs2.pdf [file ccr-21-3807_supplementary_figure_s2_suppfs2.pdf]
